# Supplementary material for: Evaluation of the EPR Effect in the CAM-Model by Molecular Imaging with MRI and PET Using 89Zr-Labeled HSA
Source: MDPI journal article supplement (doi:10.3390/cancers15041126), 2023-02-09
Supplement: s1 [file s1]

# Evaluation of the EPR Effect in the CAM-Model by Molecular Imaging with MRI and PET Using $^{89}\text{Zr}$ -Labeled HSA

Colmar Hilbrig <sup>1,\*,\dagger</sup>, Jessica Löffler <sup>1,2,\dagger</sup>, Gabriel Fischer <sup>1</sup>, Ellen Scheidhauer <sup>1</sup>, Christoph Solbach <sup>1</sup>, Markus Huber-Lang <sup>3</sup>, Ambros J. Beer <sup>1</sup>, Volker Rasche <sup>2,4</sup> and Gordon Winter <sup>1,\*</sup>

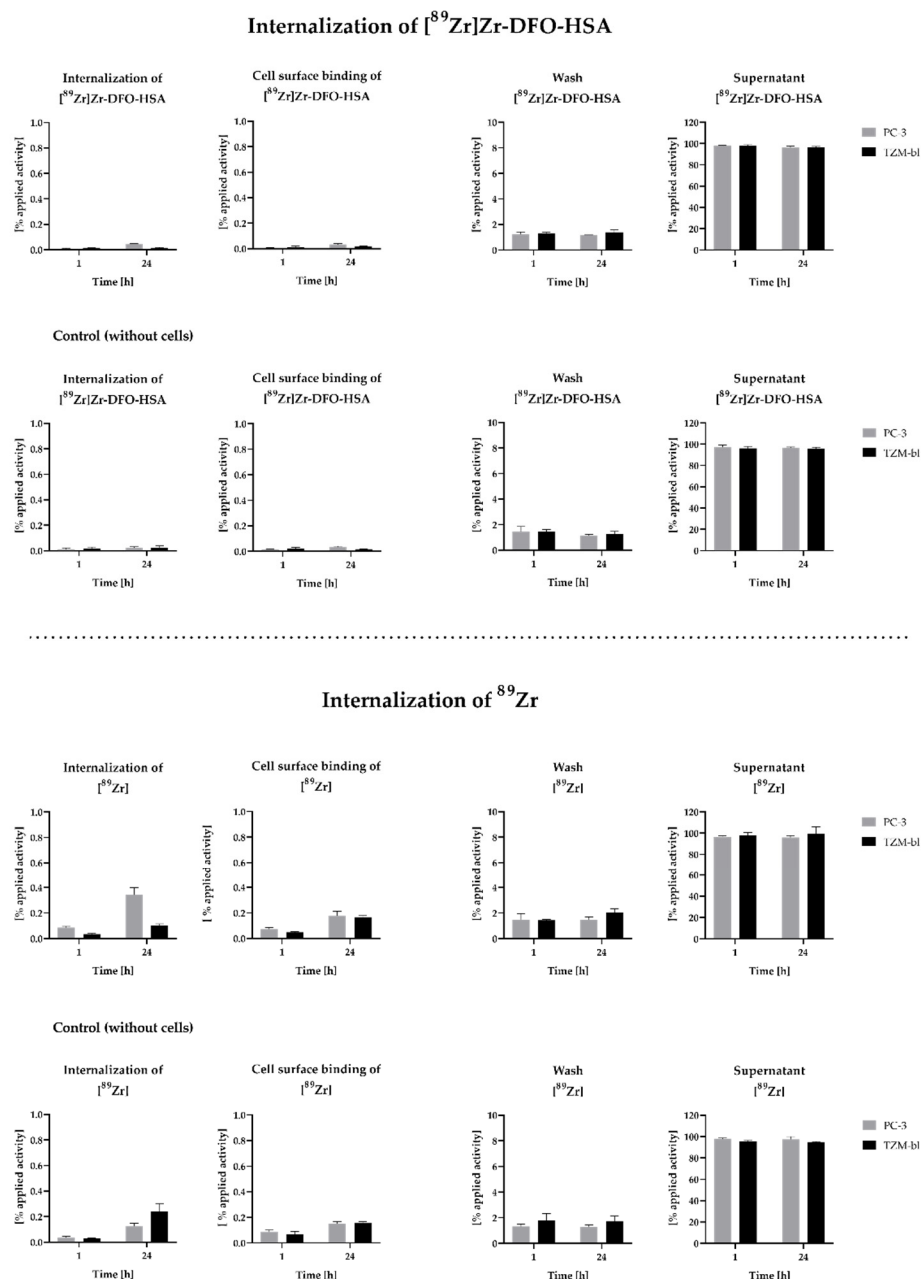

**Figure S1.** Cell surface binding and internalization of [ $^{89}\text{Zr}$ ]Zr-DFO-HSA and zirconium-89 to PC-3 and T2M-bl cells. Binding to the cells as well as internalization of [ $^{89}\text{Zr}$ ]Zr-DFO-HSA into the cells was negligible after 1 h and 24 h. Binding of zirconium-89 to PC-3 cells increased from  $(0.07 \pm 0.01)$  % to  $(0.18 \pm 0.03)$  % within 24 h. Internalization of zirconium-89 into PC-3 cells also increased from  $(0.09 \pm 0.01)$  % to  $(0.35 \pm 0.06)$  %. Binding and internalization of zirconium-89 into T2M-bl cells is also negligible.

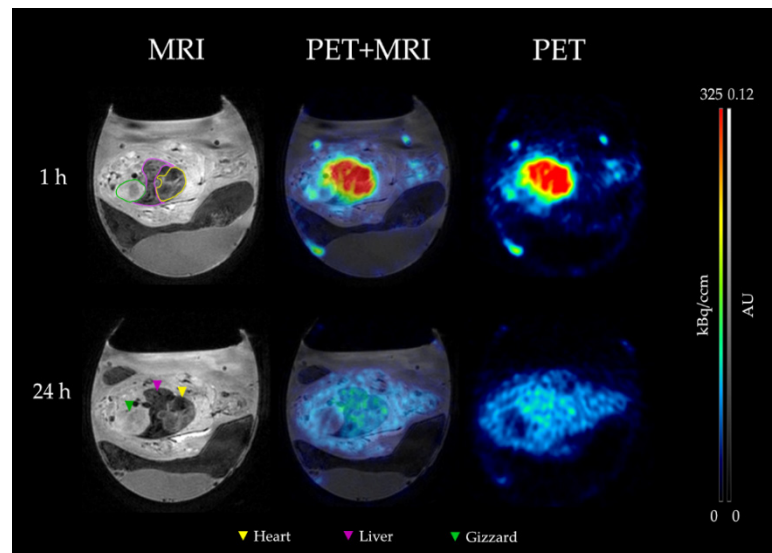

**Figure S2.**  $[^{89}\text{Zr}]\text{Zr-DFO-HSA}$  distribution illustrated in the avian heart. MR and PET image depict the same chicken egg as Figure 2, including a fusion image, of the CAM model injected with  $[^{89}\text{Zr}]\text{Zr-DFO-HSA}$  after 1h and 24h. In the T1-weighted Flash 3D sequence (left) the anatomy of the chick embryo was clearly visible, especially the heart (yellow arrow), the liver (magenta arrow) and gizzard (green arrow). The biodistribution of the radioligand could be observed in the PET images (right). During the first hour most activity is still in the blood pool, indicated by the pronounced signal coming from the heart region and blood vessels, which spilled over especially into the liver and gizzard. After 24 h the injected activity is distributed more homogeneously, except for the gizzard where no signal is detectable.

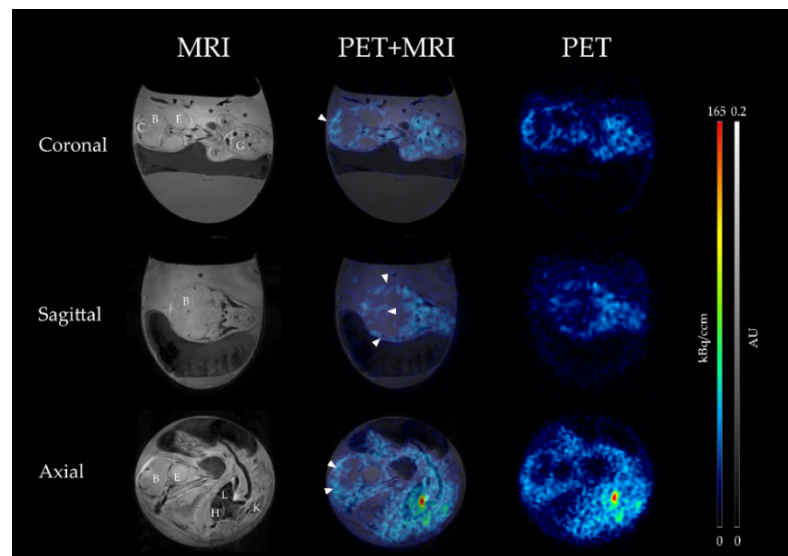

**Figure S3.** Biodistribution of  $[^{89}\text{Zr}]\text{Zr-DFO-HSA}$  in the CAM model 24h p.i. The anatomy of the chick embryo was acquired by a T1-weighted Flash 3D sequence (left). Brain (B), eye (E), cerebellum (C) gizzard (G), heart (H), liver (L) and kidneys (K) can be easily distinguished. A static reconstruction of the 60-min PET scan was used to demonstrate  $[^{89}\text{Zr}]\text{Zr-DFO-HSA}$  distribution (right). In the resulting fusion image (middle), the accumulated activity was assigned to the corresponding organs. In the brain or more precisely the cerebrum only a weak signal was detected. Within the brain, major activity was detected in the region of the cerebellum (C), where spillover through the major meningeal blood vessels (white arrows) influenced activity determination.

**Table S1.** Cell surface binding and internalisation of 89-zirkonium and [<sup>89</sup>Zr]Zr-DFO-HSA in TZM-bl and PC-3 cells

|                             | [ <sup>89</sup> Zr]Zr-DFO-HSA [counts/min] |           |           |           | [ <sup>89</sup> Zr] [counts/min] |           |           |           |
|-----------------------------|--------------------------------------------|-----------|-----------|-----------|----------------------------------|-----------|-----------|-----------|
|                             | PC-3                                       |           | TZM-bl    |           | PC-3                             |           | TZM-bl    |           |
|                             | 1h                                         | 24h       | 1h        | 24h       | 1h                               | 24h       | 1h        | 24h       |
| <b>Internalization</b>      | 16.08                                      | 193.20    | 71.73     | 27.11     | 134.28                           | 1667.89   | 210.09    | 1667.89   |
|                             | 58.92                                      | 198.70    | 60.98     | 81.29     | 225.64                           | 1872.36   | 226.36    | 1872.36   |
|                             | 16.09                                      | 225.59    | 61.04     | 65.03     | 247.24                           | 2287.05   | 172.52    | 2287.05   |
| <b>Cell surface binding</b> | 14.63                                      | 171.80    | 55.02     | 94.87     | 370.90                           | 832.45    | 225.75    | 1021.98   |
|                             | 41.92                                      | 164.10    | 38.52     | 56.03     | 370.92                           | 1010.85   | 303.00    | 854.30    |
|                             | 23.46                                      | 116.58    | 93.44     | 72.73     | 505.03                           | 1215.37   | 284.37    | 899.17    |
| <b>Wash</b>                 | 6401.64                                    | 5080.15   | 5791.61   | 7169.31   | 7520.82                          | 7162.38   | 8558.56   | 12382.80  |
|                             | 5037.47                                    | 5248.11   | 6430.04   | 6091.21   | 6290.92                          | 9318.18   | 8019.28   | 9815.23   |
|                             | 5738.82                                    | 5302.26   | 5526.61   | 5635.48   | 11473.82                         | 8831.48   | 8036.39   | 12732.21  |
| <b>Supernatant</b>          | 444835.76                                  | 436360.00 | 442973.16 | 435595.30 | 550692.12                        | 552913.24 | 570381.22 | 606104.53 |
|                             | 445354.93                                  | 439882.93 | 447263.34 | 440667.16 | 553057.05                        | 548271.65 | 556650.13 | 537178.28 |
|                             | 441894.00                                  | 429355.27 | 440310.85 | 435960.85 | 542723.85                        | 534163.19 | 539303.24 | 548687.20 |

**Table S2.** Cell surface binding and internalisation of <sup>89</sup>Zr-zirconium and [<sup>89</sup>Zr]Zr-DFO-HSA without TZM-bl and PC-3 cells

|                             | [ <sup>89</sup> Zr]Zr-DFO-HSA [counts/min] |           |           |           | [ <sup>89</sup> Zr] [counts/min] |           |           |           |
|-----------------------------|--------------------------------------------|-----------|-----------|-----------|----------------------------------|-----------|-----------|-----------|
|                             | PC-3                                       |           | TZM-bl    |           | PC-3                             |           | TZM-bl    |           |
|                             | 1h                                         | 24h       | 1h        | 24h       | 1h                               | 24h       | 1h        | 24h       |
| <b>Internalization</b>      | 32.19                                      | 69.19     | 120.19    | 168.14    | 134.28                           | 610.77    | 165.09    | 1773.15   |
|                             | 30.10                                      | 139.37    | 104.11    | 27.13     | 225.64                           | 844.07    | 145.64    | 1128.65   |
|                             | 112.64                                     | 106.90    | 34.10     | 108.50    | 247.24                           | 695.73    | 188.74    | 1174.92   |
| <b>Cell surface binding</b> | 433.80                                     | 122.09    | 58.36     | 94.94     | 433.80                           | 752.25    | 358.15    | 838.33    |
|                             | 448.28                                     | 164.22    | 93.55     | 59.51     | 448.28                           | 896.22    | 297.60    | 915.95    |
|                             | 587.72                                     | 177.46    | 143.01    | 72.84     | 587.72                           | 930.94    | 518.20    | 933.12    |
| <b>Wash</b>                 | 7469.84                                    | 5694.39   | 7464.86   | 5150.79   | 6597.79                          | 8131.20   | 13622.46  | 8918.79   |
|                             | 7854.41                                    | 5017.94   | 6037.03   | 6833.93   | 7059.29                          | 7456.57   | 8055.45   | 8263.64   |
|                             | 4767.97                                    | 4945.10   | 6241.98   | 4981.29   | 8770.71                          | 6487.20   | 8772.99   | 12418.06  |
| <b>Supernatant</b>          | 448453.29                                  | 440591.21 | 441635.23 | 429459.73 | 554725.24                        | 550182.18 | 536271.83 | 534432.41 |
|                             | 438750.89                                  | 436833.54 | 437061.56 | 439822.29 | 560035.58                        | 568628.55 | 542069.80 | 541495.11 |
|                             | 431353.11                                  | 435556.37 | 425576.92 | 431422.67 | 554649.78                        | 540151.46 | 546425.30 | 531592.02 |

**Table S3.** Total applied activity for internalization of DFO-HSA

| [ <sup>89</sup> Zr]Zr-DFO-HSA | [ <sup>89</sup> Zr] |
|-------------------------------|---------------------|
| 459975.86                     | 459975.86           |
| 449032.89                     | 449032.89           |
| 447401.43                     | 447401.43           |

**Table S4.** Data based on activity concentrations 1 h post injection calculated with PMOD in the murine model [%IA/mL]

| Time   | Blood   |         |         |         | TZM-bl |        |        |        | PC-3   |        |        |        | Brain  |        |        |        | Mouse  |        |        |        |
|--------|---------|---------|---------|---------|--------|--------|--------|--------|--------|--------|--------|--------|--------|--------|--------|--------|--------|--------|--------|--------|
| 0.0028 | 0.2789  | 1.7384  | 0.4287  | 1.7547  | 0.4374 | 1.0596 | 1.2084 | 0.8960 | 0.3869 | 0.6886 | 1.0122 | 0.6648 | 0.1152 | 0.5050 | 0.1202 | 1.3922 | 0.4138 | 0.9484 | 0.9932 | 0.8552 |
| 0.0083 | 0.7020  | 1.3517  | 0.6477  | 1.0437  | 0.5624 | 0.7180 | 0.9048 | 0.6636 | 0.4994 | 0.7540 | 1.0265 | 0.7528 | 0.1341 | 0.3253 | 0.2431 | 1.2353 | 0.4441 | 0.9071 | 0.9834 | 0.8555 |
| 0.0139 | 36.3397 | 26.9537 | 19.7676 | 1.5651  | 1.4803 | 1.3930 | 1.4462 | 0.8972 | 1.0604 | 2.1515 | 1.1864 | 0.6799 | 1.2263 | 3.6940 | 1.4418 | 0.4544 | 3.9731 | 5.2926 | 4.6051 | 0.9136 |
| 0.0194 | 47.9407 | 37.2247 | 31.4775 | 37.5193 | 1.7359 | 3.1037 | 2.5442 | 1.7918 | 1.2582 | 3.2644 | 2.5741 | 2.1362 | 3.0658 | 4.7786 | 4.0362 | 3.7631 | 6.1016 | 8.6478 | 8.5682 | 5.3094 |
| 0.0250 | 44.3291 | 35.1251 | 36.6909 | 34.1978 | 1.6493 | 3.2093 | 2.1843 | 2.2125 | 1.8856 | 3.3544 | 2.1023 | 2.6017 | 3.7849 | 2.4484 | 4.5752 | 3.2526 | 6.5175 | 8.2234 | 9.0170 | 7.0563 |
| 0.0306 | 39.6616 | 34.4215 | 33.4822 | 45.1541 | 1.8350 | 3.0523 | 2.6797 | 3.4529 | 2.2529 | 3.1342 | 2.9843 | 3.6880 | 1.2931 | 3.7249 | 3.5334 | 3.6804 | 6.4922 | 8.1572 | 9.8485 | 8.2446 |
| 0.0417 | 40.6767 | 30.5557 | 34.4411 | 41.8183 | 1.6596 | 1.8227 | 2.0612 | 1.9174 | 1.3551 | 2.9210 | 1.6835 | 2.4558 | 0.9312 | 2.8084 | 3.0236 | 3.8959 | 5.5349 | 6.7867 | 8.0005 | 6.8656 |
| 0.0583 | 39.4859 | 31.4994 | 33.7685 | 40.8377 | 1.7715 | 2.3933 | 2.0560 | 2.3712 | 1.3294 | 2.6451 | 1.6929 | 2.3217 | 2.9050 | 4.0880 | 1.9086 | 3.5861 | 5.5758 | 6.6670 | 7.9831 | 6.7964 |
| 0.0750 | 38.6593 | 28.8763 | 29.9448 | 40.9088 | 1.9101 | 2.4914 | 2.2336 | 2.5751 | 1.4259 | 2.6428 | 1.7709 | 2.8911 | 3.9239 | 2.8058 | 2.4441 | 3.4799 | 5.4928 | 6.7532 | 7.8528 | 6.8173 |
| 0.0917 | 39.2270 | 29.9018 | 33.2477 | 38.4493 | 1.8659 | 2.4724 | 2.4703 | 2.4688 | 1.5830 | 3.5642 | 2.0582 | 2.6328 | 3.3885 | 4.1046 | 2.2751 | 3.5412 | 5.4782 | 6.6739 | 8.5410 | 6.6525 |
| 0.1083 | 41.0290 | 29.4685 | 32.7350 | 38.0654 | 1.9408 | 2.6914 | 2.2587 | 2.9491 | 1.5765 | 3.5681 | 2.0754 | 2.7613 | 1.2868 | 2.3422 | 3.0220 | 3.4193 | 5.4844 | 6.6474 | 8.2646 | 6.8044 |
| 0.1250 | 41.3012 | 29.3097 | 31.5089 | 38.8230 | 1.8868 | 2.8017 | 2.2114 | 2.9677 | 1.3365 | 2.5377 | 1.8954 | 2.8605 | 1.6895 | 1.9596 | 3.5239 | 3.4426 | 5.5177 | 6.6454 | 8.0120 | 6.8020 |
| 0.1417 | 41.1778 | 28.7458 | 32.6819 | 40.3346 | 1.9381 | 2.3211 | 2.5497 | 3.3256 | 1.5080 | 2.8709 | 1.9239 | 2.8349 | 0.5864 | 1.3727 | 1.8936 | 3.3820 | 5.5190 | 6.6464 | 8.0072 | 7.1220 |
| 0.1917 | 39.2213 | 29.2184 | 30.7022 | 38.8234 | 1.8134 | 2.2708 | 1.9551 | 2.7934 | 1.3443 | 2.5444 | 1.5364 | 2.7210 | 2.2142 | 2.2843 | 1.1946 | 1.9836 | 5.1578 | 6.1480 | 7.1514 | 6.2429 |
| 0.2750 | 39.6610 | 28.6938 | 31.2658 | 38.9371 | 1.9750 | 2.3883 | 2.0045 | 3.3132 | 1.4617 | 2.9659 | 1.5765 | 2.7631 | 1.8959 | 2.5011 | 1.0038 | 2.3858 | 5.1624 | 6.1178 | 7.1954 | 6.1782 |
| 0.3583 | 39.6920 | 29.0917 | 32.1323 | 38.0357 | 2.2957 | 2.4586 | 2.1727 | 3.6304 | 1.4649 | 3.1257 | 1.7531 | 2.9172 | 1.6306 | 1.7998 | 1.9707 | 1.8983 | 5.1302 | 6.0997 | 7.1628 | 6.1967 |
| 0.4417 | 37.2405 | 29.0297 | 32.0940 | 37.0189 | 2.3909 | 2.1620 | 2.5697 | 3.9986 | 1.7972 | 3.1795 | 1.8732 | 3.3022 | 2.5602 | 1.7399 | 1.3485 | 2.1402 | 5.1323 | 6.0728 | 7.2042 | 6.1394 |
| 0.5250 | 38.3806 | 28.8597 | 31.3724 | 36.9492 | 2.5580 | 2.4640 | 2.3676 | 4.1847 | 1.8141 | 3.5886 | 1.9692 | 3.5972 | 2.8415 | 1.3993 | 2.0050 | 1.8970 | 5.1201 | 6.0698 | 7.0959 | 6.1239 |
| 0.6083 | 36.8762 | 29.1378 | 31.7093 | 36.6224 | 2.5202 | 2.5948 | 2.4406 | 4.5828 | 1.9492 | 3.5213 | 1.9430 | 3.7428 | 1.3398 | 2.4262 | 2.1398 | 2.4156 | 5.0910 | 6.0696 | 7.0862 | 6.0938 |
| 0.6917 | 37.1765 | 28.2184 | 31.3864 | 36.1929 | 2.6218 | 2.7539 | 2.5533 | 4.8559 | 2.0544 | 3.2919 | 1.9835 | 3.9161 | 2.6296 | 1.9936 | 2.3962 | 2.1862 | 5.0436 | 6.0235 | 7.1098 | 6.1928 |
| 0.7750 | 36.2967 | 28.4346 | 31.0495 | 35.8105 | 2.8009 | 2.7345 | 2.6231 | 4.8652 | 2.0975 | 3.5134 | 1.9452 | 3.8909 | 1.6146 | 2.1069 | 2.0033 | 2.1074 | 5.0554 | 6.0129 | 7.0908 | 6.0886 |
| 0.8583 | 36.6617 | 28.7833 | 30.6463 | 35.2432 | 2.7066 | 2.7191 | 2.8178 | 5.0842 | 2.1590 | 3.9095 | 2.0187 | 3.6961 | 2.0063 | 2.1933 | 2.0519 | 1.9527 | 5.0610 | 6.0246 | 7.0461 | 6.0321 |
| 0.9417 | 37.3545 | 28.1575 | 30.7297 | 35.4023 | 2.8009 | 2.8046 | 2.8545 | 5.2001 | 2.2832 | 3.9223 | 2.1975 | 4.0140 | 2.0177 | 1.8471 | 2.5729 | 1.9891 | 5.0288 | 5.9590 | 7.0630 | 6.0439 |

**Table S5.** Data based on activity concentrations 24 h post injection calculated with PMOD in the murine model in [%IA/mL]

| Time    | Blood   |        |        |         | TzM-bl |        |        |        | PC-3   |        |        |        | Brain  |        |        |        | Mouse  |        |        |        |
|---------|---------|--------|--------|---------|--------|--------|--------|--------|--------|--------|--------|--------|--------|--------|--------|--------|--------|--------|--------|--------|
| 24.0417 | 9.5504  | 9.1108 | 8.0258 | 10.0459 | 9.2386 | 8.9684 | 7.7783 | 8.8028 | 9.6330 | 9.0904 | 8.4912 | 8.9125 | 1.4387 | 1.0930 | 0.7206 | 0.8409 | 4.7042 | 4.9190 | 3.4567 | 5.3161 |
| 24.1250 | 9.5638  | 8.9341 | 7.5959 | 9.0174  | 9.2491 | 9.3061 | 7.8210 | 8.8897 | 9.6396 | 8.9644 | 8.4873 | 8.9524 | 1.1157 | 0.4992 | 0.8575 | 0.9436 | 4.6658 | 4.9228 | 3.4473 | 5.2696 |
| 24.2083 | 9.7019  | 9.5529 | 8.3711 | 8.5967  | 9.1596 | 9.2654 | 7.8773 | 8.8749 | 9.5360 | 9.2680 | 8.7152 | 9.0168 | 1.0458 | 1.1000 | 0.6865 | 1.2599 | 4.6788 | 4.8805 | 3.4653 | 5.1854 |
| 24.2917 | 10.1464 | 9.0350 | 8.7784 | 9.5182  | 9.5240 | 9.3279 | 8.0091 | 8.9819 | 9.5159 | 9.1748 | 8.6702 | 8.9609 | 1.5658 | 1.2901 | 1.0363 | 1.0344 | 4.6568 | 4.9049 | 3.4441 | 5.1605 |
| 24.3750 | 10.1564 | 9.2844 | 8.5334 | 8.9997  | 9.3613 | 9.2317 | 7.9091 | 8.8986 | 9.7120 | 8.9366 | 8.7732 | 9.2166 | 1.2507 | 0.8322 | 0.5885 | 0.9952 | 4.6462 | 4.8753 | 3.4289 | 5.2342 |
| 24.4583 | 9.9646  | 9.5577 | 9.5040 | 9.3021  | 9.5645 | 9.3133 | 8.4785 | 9.1797 | 9.6686 | 9.4227 | 9.0395 | 8.9766 | 1.6235 | 1.4843 | 0.7225 | 0.8952 | 4.6598 | 4.9064 | 3.5021 | 5.2257 |
| 24.5417 | 10.1939 | 8.8828 | 8.5455 | 8.9315  | 9.5012 | 9.0099 | 8.0592 | 8.6745 | 9.5746 | 9.1663 | 8.9009 | 9.1672 | 0.8911 | 0.8302 | 0.4885 | 0.7948 | 4.6400 | 4.8904 | 3.4346 | 5.2381 |
| 24.6250 | 10.2110 | 8.8850 | 8.1965 | 8.3267  | 9.3983 | 9.2978 | 7.9328 | 8.7422 | 9.6983 | 9.0100 | 8.7661 | 9.0269 | 0.9846 | 0.5645 | 1.3675 | 0.8331 | 4.6443 | 4.8624 | 3.4329 | 5.2086 |
| 24.7083 | 9.6166  | 9.3103 | 8.0624 | 9.7859  | 9.2842 | 9.1228 | 8.1463 | 9.1340 | 9.6039 | 9.2959 | 8.7575 | 9.2141 | 1.6359 | 0.7239 | 1.3503 | 1.2273 | 4.6276 | 4.8755 | 3.4363 | 5.2109 |
| 24.7917 | 10.2108 | 9.3427 | 8.2726 | 9.0167  | 9.0561 | 9.2056 | 7.9802 | 8.8065 | 9.6092 | 9.1454 | 8.7860 | 9.0171 | 1.0759 | 0.5720 | 0.8358 | 1.1423 | 4.6200 | 4.8351 | 3.4424 | 5.2263 |
| 24.8750 | 9.9052  | 9.2681 | 8.1427 | 8.7907  | 9.1502 | 9.1753 | 8.1062 | 9.2019 | 9.5860 | 9.0787 | 8.7069 | 9.1474 | 1.1958 | 0.9136 | 0.6937 | 0.9258 | 4.6145 | 4.8633 | 3.3839 | 5.2465 |
| 24.9583 | 9.9596  | 9.1962 | 8.2058 | 8.7740  | 9.4368 | 9.2607 | 8.3180 | 8.9434 | 9.6351 | 9.1145 | 8.7463 | 9.1550 | 1.0371 | 1.2879 | 1.3576 | 0.5469 | 4.6152 | 4.8858 | 3.4120 | 5.1715 |

**Table S6.** Data based on activity concentrations 1 h post injection calculated with PMOD in the CAM model in [%IA/mL]

| Time   | Blood   |         |         |         |         | TZM-bl |        |        |        |        | PC-3   |        |        |        |        | Brain  |        |        |        |        | Chicken embryo |        |        |        |        |
|--------|---------|---------|---------|---------|---------|--------|--------|--------|--------|--------|--------|--------|--------|--------|--------|--------|--------|--------|--------|--------|----------------|--------|--------|--------|--------|
| 0.0028 | 0.1827  | 1.0306  | 0.1487  | 6.7424  | 1.2815  | 0.0558 | 0.4464 | 0.1151 | 0.1286 | 0.1803 | 0.1839 | 0.0926 | 0.2155 | 0.2819 | 0.3427 | 0.1726 | 0.3085 | 0.0841 | 0.1392 | 0.1552 | 0.1611         | 0.3937 | 0.2573 | 0.6133 | 0.3680 |
| 0.0083 | 31.2287 | 0.6249  | 27.9243 | 37.5435 | 91.6061 | 0.4500 | 0.2490 | 0.3701 | 0.7072 | 0.2868 | 0.1307 | 0.0659 | 0.4041 | 1.0863 | 0.4041 | 0.5252 | 0.4700 | 0.2361 | 0.6699 | 1.2317 | 2.1443         | 0.3836 | 1.9984 | 2.3911 | 3.5902 |
| 0.0139 | 37.6885 | 1.4012  | 30.2145 | 21.2316 | 89.7570 | 0.7291 | 1.4092 | 2.7894 | 0.6971 | 0.9161 | 0.8258 | 0.1625 | 1.2855 | 0.4859 | 1.1415 | 2.4572 | 0.3516 | 0.5840 | 1.1887 | 3.7676 | 3.2065         | 0.6181 | 2.9210 | 2.6936 | 4.1477 |
| 0.0194 | 24.8946 | 19.9451 | 26.0299 | 17.4056 | 54.5703 | 0.3538 | 2.4584 | 0.7878 | 0.7601 | 1.0440 | 0.1803 | 1.5287 | 0.0812 | 0.2709 | 0.7991 | 2.1104 | 1.5818 | 0.8582 | 1.2192 | 3.5622 | 3.1395         | 2.2500 | 2.7873 | 2.7398 | 3.7948 |
| 0.0250 | 22.2918 | 15.2415 | 23.7558 | 17.1420 | 40.3821 | 0.3251 | 2.5321 | 2.2582 | 0.7296 | 0.1309 | 0.2393 | 1.0871 | 0.2918 | 0.8547 | 0.4286 | 2.3957 | 2.5694 | 0.9846 | 1.1485 | 2.6574 | 3.2506         | 2.6383 | 2.7979 | 2.7750 | 3.7151 |
| 0.0306 | 21.7623 | 19.0532 | 20.7743 | 18.6250 | 37.2338 | 0.6278 | 2.8534 | 1.8376 | 1.0992 | 0.1783 | 0.2622 | 1.4015 | 0.9051 | 0.1823 | 0.7499 | 2.3707 | 2.1953 | 1.1411 | 1.1771 | 2.1646 | 3.3268         | 2.6555 | 2.8031 | 2.7733 | 3.6901 |
| 0.0417 | 21.7957 | 18.8358 | 19.9128 | 18.3118 | 33.6914 | 0.7518 | 1.5225 | 0.9525 | 0.3314 | 0.5457 | 0.2524 | 0.0760 | 0.4138 | 0.6019 | 0.6634 | 2.2336 | 1.3218 | 0.7607 | 1.2258 | 1.6927 | 3.0518         | 2.0960 | 2.3944 | 2.5788 | 3.3989 |
| 0.0583 | 23.0542 | 18.8422 | 22.4588 | 18.2584 | 30.2957 | 0.4738 | 1.0112 | 1.7255 | 0.6304 | 0.8544 | 0.2345 | 0.5590 | 0.4574 | 0.5878 | 0.9499 | 2.0260 | 1.4860 | 0.8277 | 1.2344 | 1.9380 | 3.0780         | 2.1150 | 2.3984 | 2.5766 | 3.3368 |
| 0.0750 | 22.1900 | 21.2495 | 20.2431 | 18.0814 | 27.9856 | 0.7485 | 1.2217 | 2.0232 | 0.1235 | 0.4906 | 0.1030 | 0.0533 | 0.3965 | 0.6527 | 1.0434 | 2.0186 | 1.7315 | 0.9512 | 1.2327 | 2.1639 | 3.0754         | 2.4150 | 2.3336 | 2.5591 | 3.3374 |
| 0.0917 | 20.8791 | 22.1360 | 16.7512 | 18.3182 | 27.2122 | 0.5114 | 1.9194 | 1.6851 | 0.9419 | 0.7606 | 0.0278 | 0.1640 | 0.4699 | 0.5717 | 0.5846 | 2.1644 | 1.6734 | 1.0388 | 1.1581 | 2.0607 | 3.0722         | 2.5085 | 2.3291 | 2.5675 | 3.3054 |
| 0.1083 | 19.8635 | 21.5090 | 18.1102 | 17.8369 | 26.4727 | 1.3378 | 2.9130 | 0.9051 | 0.5698 | 0.3062 | 0.1912 | 0.5416 | 0.4042 | 0.3738 | 1.3701 | 2.0938 | 1.7753 | 0.9190 | 1.1633 | 2.0754 | 3.0696         | 2.7094 | 2.2345 | 2.5720 | 3.2542 |
| 0.1250 | 22.1182 | 21.9876 | 20.9398 | 17.3651 | 26.0910 | 0.6345 | 1.4616 | 2.1354 | 0.5727 | 0.5823 | 0.0097 | 0.5765 | 0.8656 | 0.5335 | 1.0402 | 2.0017 | 1.6216 | 0.9603 | 1.1880 | 2.1809 | 3.0634         | 2.7014 | 2.1966 | 2.5636 | 3.3382 |
| 0.1417 | 21.2895 | 22.6109 | 13.7944 | 18.2631 | 24.8536 | 0.1173 | 1.4282 | 1.2396 | 0.2749 | 0.9662 | 0.2138 | 0.7628 | 0.0234 | 0.6384 | 0.6017 | 2.0538 | 2.0802 | 0.9658 | 1.1667 | 2.0675 | 3.0784         | 2.7227 | 2.1481 | 2.6105 | 3.2977 |
| 0.1917 | 21.0703 | 21.9960 | 18.2712 | 17.1076 | 24.4256 | 0.2507 | 1.2076 | 1.4471 | 0.5054 | 0.5658 | 0.0372 | 0.2287 | 0.1362 | 0.4871 | 0.4780 | 1.9201 | 1.7954 | 0.8830 | 1.1193 | 2.1087 | 2.9302         | 2.5323 | 2.0043 | 2.4886 | 3.2189 |
| 0.2750 | 20.4389 | 22.6011 | 17.4093 | 16.6337 | 23.6723 | 0.4004 | 0.9917 | 1.1362 | 0.6974 | 0.6981 | 0.1650 | 0.2554 | 0.2559 | 0.6335 | 0.6259 | 1.9741 | 1.8156 | 0.8441 | 1.0430 | 2.0141 | 2.8628         | 2.5604 | 1.9562 | 2.4791 | 3.1959 |
| 0.3583 | 19.0180 | 22.5210 | 16.8636 | 16.0450 | 23.3360 | 0.4708 | 1.1786 | 0.7692 | 0.5927 | 0.6665 | 0.2589 | 0.3529 | 0.4046 | 0.6308 | 1.0031 | 2.0123 | 1.7590 | 0.8278 | 1.1177 | 2.0357 | 2.7697         | 2.5662 | 1.9315 | 2.4680 | 3.1695 |
| 0.4417 | 19.1683 | 22.2039 | 15.8735 | 14.5514 | 23.4191 | 0.8468 | 1.6402 | 1.2216 | 0.4507 | 0.6612 | 0.4272 | 0.1519 | 0.6824 | 0.5722 | 0.7130 | 2.0513 | 1.7352 | 0.8112 | 1.1731 | 1.9444 | 2.7721         | 2.5634 | 1.8899 | 2.4447 | 3.1730 |
| 0.5250 | 19.3335 | 21.2603 | 15.3637 | 14.0008 | 23.4028 | 0.3828 | 1.3823 | 0.9683 | 0.3933 | 0.4330 | 0.2652 | 0.0654 | 0.2908 | 0.4282 | 0.3676 | 2.0114 | 1.8491 | 0.8037 | 1.1061 | 1.9386 | 2.7443         | 2.5621 | 1.8816 | 2.4413 | 3.1489 |
| 0.6083 | 18.9839 | 21.1867 | 13.7758 | 13.6772 | 22.7590 | 0.7716 | 1.3915 | 0.7884 | 0.1776 | 0.5437 | 0.3601 | 0.5712 | 0.8182 | 0.6147 | 0.6417 | 2.1102 | 1.7799 | 0.8317 | 1.0673 | 1.9707 | 2.7186         | 2.5461 | 1.8614 | 2.4394 | 3.1508 |
| 0.6917 | 18.2056 | 19.2024 | 13.8019 | 13.4839 | 22.6997 | 0.7542 | 0.6554 | 0.5777 | 0.4602 | 0.6032 | 0.0664 | 0.4618 | 1.0967 | 0.8125 | 0.5861 | 2.1561 | 1.8248 | 0.8576 | 1.1312 | 1.9855 | 2.6786         | 2.5397 | 1.8611 | 2.4439 | 3.1354 |
| 0.7750 | 18.8609 | 18.5730 | 12.8009 | 12.1684 | 20.1930 | 0.6671 | 1.2193 | 1.3842 | 0.7121 | 0.6417 | 0.0763 | 0.4640 | 1.0233 | 0.5285 | 0.8950 | 2.2127 | 1.8463 | 0.8038 | 1.4050 | 1.8693 | 2.7205         | 2.5037 | 1.8568 | 2.4327 | 3.1046 |
| 0.8583 | 18.3338 | 17.8963 | 12.6444 | 12.6727 | 20.9193 | 0.8476 | 1.2559 | 1.1480 | 0.3773 | 0.8393 | 0.2212 | 0.4577 | 1.0657 | 0.6006 | 1.1696 | 2.0323 | 1.5775 | 0.8400 | 1.4011 | 1.8704 | 2.7567         | 2.5200 | 1.8661 | 2.4389 | 3.1158 |
| 0.9417 | 17.8249 | 17.5156 | 12.6841 | 12.0131 | 19.3804 | 0.6376 | 1.3122 | 1.2515 | 0.4600 | 0.7293 | 0.5263 | 0.2806 | 0.7664 | 0.5372 | 0.9487 | 1.9892 | 1.7290 | 0.8573 | 1.4252 | 1.8359 | 2.7194         | 2.4966 | 1.8576 | 2.4445 | 3.1020 |

**Table S7.** Data based on activity concentrations 24 h post injection calculated with PMOD in the CAM model [%IA/mL]

| Time    | Blood  |        |        |        |        | T2M-bl |        |        |        |        | PC-3   |        |        |        |        | Brain  |        |        |        |        | Chicken embryo |        |        |        |        |
|---------|--------|--------|--------|--------|--------|--------|--------|--------|--------|--------|--------|--------|--------|--------|--------|--------|--------|--------|--------|--------|----------------|--------|--------|--------|--------|
| 24.0417 | 7.6427 | 4.9099 | 4.5106 | 4.8306 | 6.8548 | 2.5051 | 2.1816 | 2.6184 | 1.9233 | 2.9708 | 2.5362 | 2.5057 | 1.5807 | 1.3698 | 2.5281 | 3.3333 | 1.5904 | 1.3008 | 2.1344 | 2.2728 | 2.9857         | 2.4057 | 2.4628 | 2.9056 | 3.3031 |
| 24.1250 | 7.7838 | 4.9200 | 4.7781 | 4.8702 | 6.5502 | 3.6476 | 2.0596 | 2.8163 | 1.7463 | 2.6244 | 2.4628 | 3.3332 | 1.2117 | 1.5907 | 2.6445 | 3.3800 | 1.5390 | 1.2797 | 2.1534 | 2.3068 | 2.9784         | 2.4284 | 2.4316 | 2.9232 | 3.2944 |
| 24.2083 | 7.5320 | 4.8371 | 4.5711 | 4.8951 | 7.0488 | 3.4233 | 1.8728 | 2.2084 | 2.5867 | 2.8416 | 2.4310 | 3.4078 | 1.9851 | 1.4797 | 2.4457 | 3.2395 | 1.6144 | 1.2664 | 2.1615 | 2.3107 | 2.9465         | 2.4297 | 2.4339 | 2.9060 | 3.2978 |
| 24.2917 | 7.6370 | 4.6075 | 4.7457 | 4.7861 | 7.0234 | 5.3838 | 2.0315 | 2.3457 | 2.7040 | 3.7075 | 2.6471 | 2.5982 | 1.3551 | 1.6731 | 2.3417 | 3.3465 | 1.6506 | 1.2734 | 2.3507 | 2.2733 | 2.9727         | 2.4198 | 2.4306 | 2.9355 | 3.3012 |
| 24.3750 | 7.4360 | 4.8493 | 4.7864 | 5.0422 | 6.8882 | 4.2213 | 1.9053 | 2.7790 | 2.2847 | 3.0803 | 2.7251 | 2.6487 | 1.6455 | 2.0389 | 2.3525 | 3.3487 | 1.5734 | 1.2812 | 2.3040 | 2.3268 | 2.9239         | 2.4016 | 2.4274 | 2.9167 | 3.2752 |
| 24.4583 | 6.9076 | 4.9188 | 4.1183 | 4.7509 | 7.0005 | 5.7562 | 2.2491 | 2.6789 | 1.8857 | 3.0180 | 2.3198 | 2.5391 | 1.3630 | 1.8950 | 2.7696 | 3.2295 | 1.5622 | 1.1908 | 2.2349 | 2.3514 | 2.9206         | 2.3962 | 2.4569 | 2.9217 | 3.2859 |
| 24.5417 | 7.1266 | 5.0466 | 4.9489 | 4.9335 | 7.0404 | 5.3956 | 2.2954 | 2.2929 | 2.2741 | 2.4525 | 3.2961 | 2.3487 | 1.8386 | 1.9945 | 2.3371 | 3.2420 | 1.5100 | 1.2494 | 2.2673 | 2.2504 | 2.9116         | 2.4004 | 2.4483 | 2.9258 | 3.2823 |
| 24.6250 | 7.4581 | 5.0209 | 4.6444 | 4.4778 | 6.8360 | 4.7209 | 2.9362 | 2.2419 | 2.3628 | 3.2096 | 2.8150 | 3.0808 | 1.6522 | 1.0384 | 2.4978 | 3.1666 | 1.6536 | 1.2686 | 2.2329 | 2.2956 | 2.8712         | 2.3950 | 2.4105 | 2.9025 | 3.2760 |
| 24.7083 | 7.1448 | 4.8334 | 4.6226 | 4.9021 | 7.0590 | 5.5503 | 1.9814 | 2.3715 | 2.1107 | 2.7579 | 2.5488 | 1.6881 | 1.9969 | 1.2707 | 2.6177 | 3.2057 | 1.5879 | 1.3183 | 2.2864 | 2.3163 | 2.8619         | 2.4106 | 2.4225 | 2.9187 | 3.3077 |
| 24.7917 | 6.9383 | 5.0045 | 4.7765 | 4.8470 | 7.2260 | 5.4147 | 1.8524 | 2.7959 | 1.9678 | 2.5008 | 3.4213 | 1.4651 | 2.1379 | 1.3118 | 3.1960 | 3.0967 | 1.5988 | 1.3008 | 2.2196 | 2.3804 | 2.8188         | 2.3984 | 2.4287 | 2.9161 | 3.3042 |
| 24.8750 | 7.2032 | 4.9313 | 5.1698 | 4.8757 | 7.0582 | 4.4884 | 2.4705 | 2.3822 | 2.1441 | 3.0406 | 2.6250 | 2.0186 | 1.3626 | 1.6900 | 3.1657 | 3.0594 | 1.5666 | 1.1947 | 2.2211 | 2.3018 | 2.7984         | 2.3951 | 2.4328 | 2.9360 | 3.2957 |
| 24.9583 | 6.6246 | 4.5422 | 4.2821 | 4.8982 | 7.1570 | 3.9303 | 1.5780 | 2.9567 | 1.6860 | 2.6980 | 2.9872 | 2.9277 | 1.9532 | 1.7014 | 2.5242 | 2.9450 | 1.5391 | 1.2726 | 2.2368 | 2.2825 | 2.7870         | 2.4127 | 2.4268 | 2.9524 | 3.3013 |



**Table S8.** Final activity measured with PET and  $\gamma$ -counter [%IA/mL] and [%IA/mg]

| PET          |                |              |                |             |               |               |                 | $\gamma$ -counter |                |              |                |             |               |               |                 |
|--------------|----------------|--------------|----------------|-------------|---------------|---------------|-----------------|-------------------|----------------|--------------|----------------|-------------|---------------|---------------|-----------------|
| Blood<br>CAM | Blood<br>Mouse | Brain<br>CAM | Brain<br>Mouse | PC-3<br>CAM | PC-3<br>Mouse | TZM-bl<br>CAM | TZM-bl<br>Mouse | Blood<br>CAM      | Blood<br>Mouse | Brain<br>CAM | Brain<br>Mouse | PC-3<br>CAM | PC-3<br>Mouse | TZM-bl<br>CAM | TZM-bl<br>Mouse |
| 8.321        | 6.940          | 3.219        | 1.345          | 2.576       | 8.090         | 4.187         | 6.992           | 5.454             | 9.980          | 1.820        | 0.350          | 1.510       | 7.723         | 6.600         | 7.536           |
| 11.868       | 4.742          | 2.740        | 1.312          | 1.575       | 11.793        | 1.408         | 11.881          | 3.334             | 9.120          | 1.740        | 0.280          | 3.750       | 8.343         | 2.690         | 9.735           |
| 11.161       | 5.294          | 2.442        | 1.192          | 1.588       | 11.674        | 2.339         | 10.736          | 3.623             | 9.530          | 1.930        | 0.370          | 2.620       | 6.676         | 2.980         | 8.066           |
| 10.400       | 6.946          | 3.046        | 1.334          | 2.615       | 10.203        | 2.905         | 11.347          | 5.265             | 8.640          |              | 0.240          | 3.340       | 7.253         | 5.320         | 7.835           |
| 7.200        |                | 3.216        |                | 2.904       |               | 4.257         |                 | 3.767             |                |              |                | 7.730       |               | 4.910         |                 |

**Table S9.** Overview of tumor weights [g].

| Tumors [g] | CAM model         | SCID Mouse model  |
|------------|-------------------|-------------------|
| TZM-bl     | 0.031 $\pm$ 0.005 | 0.388 $\pm$ 0.124 |
| PC-3       | 0.015 $\pm$ 0.006 | 0.391 $\pm$ 0.114 |
